# Supplementary material
Source: MDPI journal article supplement (https://www.mdpi.com/2504-5377/2/1/3)
Supplement: s1 [file s1]

Archive with 2 entries (2 files):
- colloids-260727-graphical.png
- colloids-260727-supplementary-final.pdf
