# Supplementary material
Source: MDPI journal article supplement (https://www.mdpi.com/2504-5377/2/1/3)

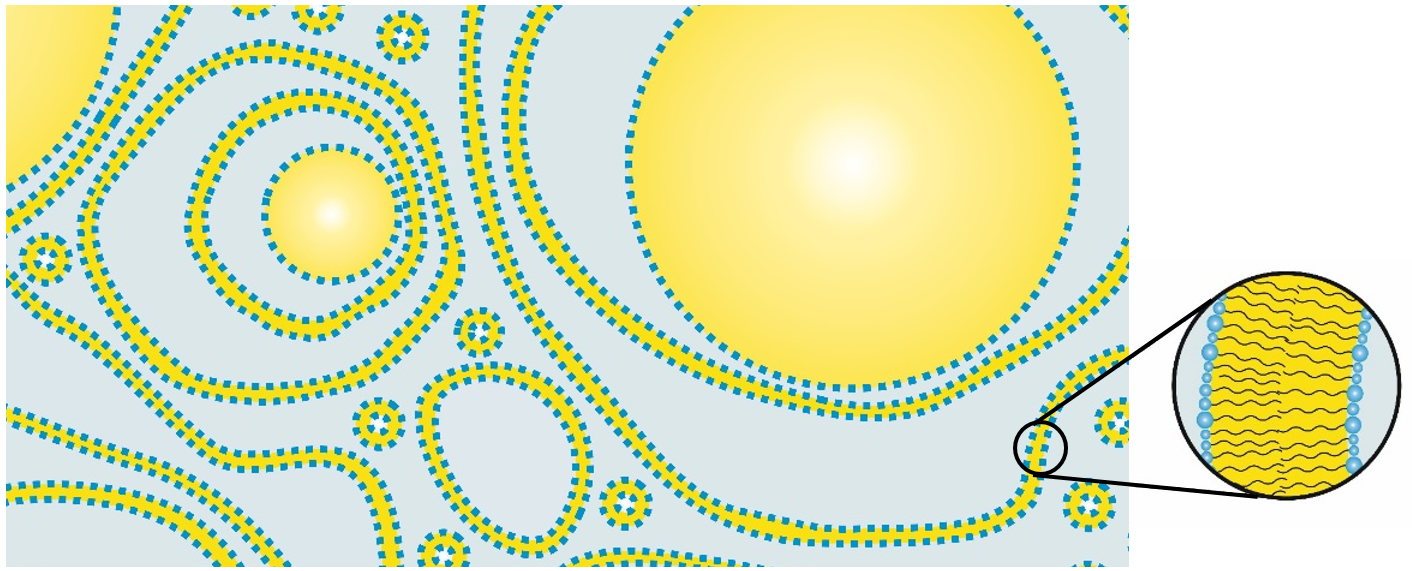

Supplement: s1 [file s1 › colloids-260727-graphical.png]
